# Supplementary material for: Brief communication: Organochlorine pesticides in an archived firn core from Law Dome, East Antarctica
Source: Copernicus journal article supplement (doi:10.5194/tc-10-2533-2016), 2016-10-26
Supplement: Supplementary file 1 [file tc-10-2533-2016-supplement.pdf]

Supplement of The Cryosphere, 10, 2533–2539, 2016  
<http://www.the-cryosphere.net/10/2533/2016/>  
doi:10.5194/tc-10-2533-2016-supplement  
© Author(s) 2016. CC Attribution 3.0 License.

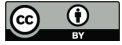

*Supplement of*

## **Brief communication: Organochlorine pesticides in an archived firn core from Law Dome, East Antarctica**

**Marie Bigot et al.**

*Correspondence to:* Marie Bigot ([mbigot1@gmail.com](mailto:mbigot1@gmail.com))

The copyright of individual parts of the supplement might differ from the CC-BY 3.0 licence.

**Table 1: Surrogate standard recoveries for ice core sample A and B (in %)**

| Sampling material                                 | XAD<br>(dissolved<br>compounds) |     | Glass fibre filter<br>(particles) |    |     |
|---------------------------------------------------|---------------------------------|-----|-----------------------------------|----|-----|
|                                                   | Sample #                        | A   | B                                 | A  | B   |
| Hexachlorobenzene, <sup>13</sup> C <sub>6</sub> - |                                 | 15  | 18                                | 17 | 6   |
| α-HCH, <sup>13</sup> C <sub>6</sub> -             |                                 | 46  | 53                                | 47 | 50  |
| γ-HCH-D6                                          |                                 | 30  | 39                                | 48 | 51  |
| Heptachlor, <sup>13</sup> C <sub>10</sub> -       |                                 | 130 | 128                               | 77 | 80  |
| Oxychlorane, <sup>13</sup> C <sub>10</sub> -      |                                 | 49  | 56                                | 64 | 64  |
| trans-Nonachlor, <sup>13</sup> C <sub>10</sub> -  |                                 | 63  | 66                                | 51 | 59  |
| Dieldrin, <sup>13</sup> C <sub>12</sub> -         |                                 | 47  | 55                                | 52 | 58  |
| Endrin, <sup>13</sup> C <sub>12</sub> -           |                                 | 49  | 67                                | 72 | 82  |
| Endosulfan II, <sup>13</sup> C <sub>9</sub> -     |                                 | 22  | 34                                | 43 | 49  |
| 4,4'-DDE, <sup>13</sup> C <sub>12</sub> -         |                                 | 36  | 42                                | 43 | 46  |
| 4,4'-DDD, <sup>13</sup> C <sub>12</sub> -         |                                 | 14  | 21                                | 42 | 42  |
| 4,4'-DDT, <sup>13</sup> C <sub>12</sub> -         |                                 | 8   | 11                                | 40 | 36  |
| Methoxychlor-D6                                   |                                 | 102 | 168                               | 37 | 36  |
| Mirex, <sup>13</sup> C <sub>10</sub> -            |                                 | 5   | 5                                 | 21 | 18  |
| Mirex, <sup>13</sup> C <sub>8</sub> -*            |                                 | 7   | 6                                 | 30 | 28  |
| δ-HCH*                                            |                                 | 135 | 67                                | 96 | 110 |

Notes: \* indicates surrogate standards added prior to sampling (XAD) or prior to extraction (filters)

**Table 2 Concentrations and deposition rates of detected OCPs in Law Dome firn core, sample A (1945-57) and sample B (1958-67)**

|                 | Sample A           |                    |                                       | Sample B           |                                       |
|-----------------|--------------------|--------------------|---------------------------------------|--------------------|---------------------------------------|
|                 | MDL                | Concentration      | Deposition rate                       | Concentration      | Deposition rate                       |
|                 | pg·L <sup>-1</sup> | pg·L <sup>-1</sup> | pg·cm <sup>-2</sup> ·yr <sup>-1</sup> | pg·L <sup>-1</sup> | pg·cm <sup>-2</sup> ·yr <sup>-1</sup> |
| α-HCH           | 0.87               | 22                 | 0.24                                  | 19                 | 0.25                                  |
| γ-HCH           | 1.18               | 22                 | 0.24                                  | 60                 | 0.78                                  |
| Heptachlor      | 0.51               | 2.3                | 0.03                                  | 2.4                | 0.03                                  |
| trans-Chlordane | 1.25               | < 3.3              | -                                     | 5.0                | 0.07                                  |
| Dieldrin        | 4.75               | 222                | 2.4                                   | 310                | 4.0                                   |
| Endrin          | 1.20               | 4.8                | 0.05                                  | 8.3                | 0.11                                  |

Notes: MDL stands for method detection limits, < indicates values detected below limits of quantifications (determined for each individual sample).
